# Supplementary material for: CLUB-MARTINI: Selecting Favourable Interactions amongst Available Candidates, a Coarse-Grained Simulation Approach to Scoring Docking Decoys
Source: PLOS journal article supplement (doi:10.1371/journal.pone.0155251), 2016-05-11
Supplement: S5 (10.1371/journal.pone.0155251.s005) [file journal.pone.0155251.s005]

| Group           | Target 35 | Target 37 | Target38 | Target39 | Target40 | Target41 | Total |
|-----------------|-----------|-----------|----------|----------|----------|----------|-------|
| Bates           |           | 6/1***    |          |          | 10/9**   | 4*       | 8     |
| Bonvin          |           | 2/1**     |          |          | 10/2***  | 10*      | 8     |
| Weng            |           | 2/1***    |          | 0        | 7/2***   | 4*       | 8     |
| Wang            | 1*        | 6/4**     |          |          | 8/1***   | 7*       | 7     |
| Zou             |           | 4/2***    |          |          | 10/2***  | 10/2***  | 7     |
| Elber           |           |           |          |          | 8/3***   | 1*       | 5     |
| Fernandez-Recio |           |           |          | 0        |          | 3/2**    | 5     |
| Xiao            |           |           |          |          |          | 7/4**    | 4     |
| Camacho         |           |           | 0        |          | 10/9***  |          | 3     |
| Gray            |           |           |          |          |          |          | 3     |
| Grudin          |           |           |          |          |          | 0        | 3     |
| Haliloglu       |           | 5/4**     |          |          | 6/4***   |          | 3     |
| Kihara          |           |           |          |          |          | 3/1**    | 3     |
| Wolfson         |           | 1*        |          |          | 9/6***   |          | 3     |
| Korkin          |           |           |          |          |          |          | 2     |
| Takeda-Shitaka  |           |           |          |          | 10***    | 10/2**   | 2     |
| Bajaj           |           |           |          |          |          |          | 1     |
| Mitchell        |           | 2*        |          |          |          |          | 1     |
| Seok            |           |           |          |          |          |          | 1     |
| Umeyama         |           |           |          |          |          |          | 1     |
| Vajda           |           |           |          |          |          |          | 1     |
| Vakser          |           |           |          |          |          |          | 1     |
| AZE             |           | 1***      |          |          |          |          | 1     |
| Liu             |           |           | Liu      |          | 4/4**    |          | 1     |
| Samson+Hex      |           |           |          |          |          | 10/1**   | 1     |
| CLUSPRO         |           |           |          |          |          |          |       |
| Cui             |           |           |          |          |          |          |       |
| Eisenstein      |           |           |          |          |          |          |       |
| FIBERDOCK       |           |           |          |          |          |          |       |
| HADDOCK         |           |           |          |          |          |          |       |
| HEXSERVER       |           |           |          |          |          |          |       |
| Luethy          |           |           |          |          |          |          |       |
| Nakamura        |           |           |          |          |          |          |       |
| Ritchie         |           |           |          |          |          |          |       |
| Shen            |           |           |          |          |          |          |       |
| Zacharias       |           |           |          |          |          |          |       |
| Zhou            |           |           |          |          |          |          |       |
| Pal             |           |           |          |          |          |          |       |
| Poupon          |           |           |          |          |          |          |       |
| Ten Eyck        |           |           |          |          |          |          |       |
